# Supplementary material for: Traceable determination of metal composition of tyres using tandem ICP-MS and benchmarking of emissions inventories
Source: Royal Society of Chemistry journal article supplement (doi:10.1039/d3em00344b), 2024-01-01
Supplement: d3em00344b2.pdf [file d3em00344b2.pdf]

## 1 Supplementary information

2

3 **Supplementary Table 1** Mass fraction and uncertainty ( $k = 2$ ) of analyte in tyre samples of different brands and  
4 models ( $\mu\text{g g}^{-1}$ ). Results are an average of 5 replicates and are not presented if <LoD.

| Sample |               | Mg   | Al  | Ti   | Fe   | Ni   | Cu   | Zn    | Ba   | Pb   |
|--------|---------------|------|-----|------|------|------|------|-------|------|------|
| UKT242 | Mass fraction | 43.7 | 638 | 71.4 | 117  | 3.88 | 2.93 | 8150  | 2.39 | 29.2 |
|        | Uncertainty   | 6.0  | 56  | 4.1  | 11   | 0.62 | 0.16 | 421   | 0.17 | 3.0  |
| UKT244 | Mass fraction | 40.2 | 554 | 64.2 | 117  | 2.95 | 2.25 | 6851  | 1.68 | 25.4 |
|        | Uncertainty   | 5.4  | 39  | 5.1  | 10   | 0.48 | 0.26 | 354   | 0.20 | 2.7  |
| UKT245 | Mass fraction | 51.7 | 643 | 25.9 | 67.6 | 1.80 | 2.17 | 8146  | -    | 28.6 |
|        | Uncertainty   | 6.9  | 63  | 4.6  | 6.9  | 0.30 | 0.15 | 406   | -    | 2.9  |
| UKT246 | Mass fraction | 63.6 | 936 | 55.6 | 155  | 2.98 | 4.28 | 8844  | 8.29 | 8.80 |
|        | Uncertainty   | 6.5  | 94  | 8.3  | 13   | 0.49 | 0.27 | 435   | 0.52 | 0.99 |
| UKT247 | Mass fraction | 73.3 | 707 | 18.4 | 54.3 | 1.32 | 2.54 | 13150 | -    | 14.1 |
|        | Uncertainty   | 13.8 | 69  | 1.7  | 7.3  | 0.28 | 0.20 | 570   | -    | 1.7  |
| Mean   | Mass fraction | 54.5 | 695 | 47.1 | 102  | 2.6  | 2.8  | 9028  | 2.72 | 21.2 |
|        | Uncertainty   | 18.1 | 162 | 13.7 | 25.9 | 1.0  | 0.6  | 1421  | 2.2  | 5.7  |

6

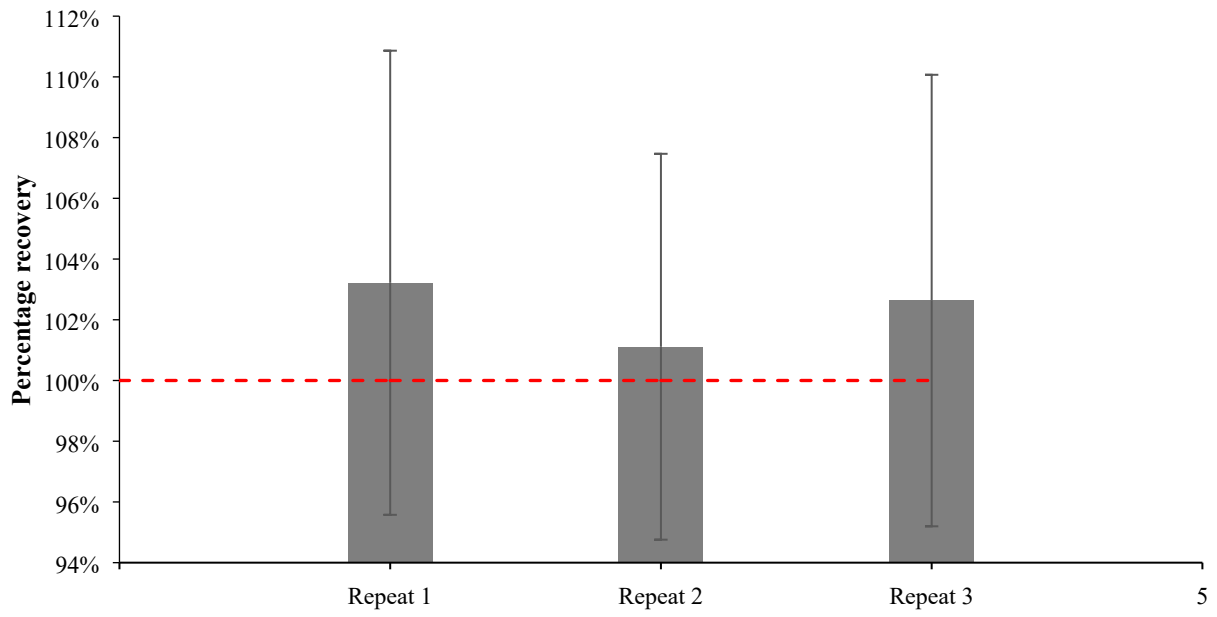

7

8 **Supplementary Figure 1** Percentage recovery of Y spiked onto tyre sample over 3 repeat measurements.

9 **Supplementary Table 2** Details of calculations used to estimate emission rates.

|                                                                                                           | <b>Mg</b> | <b>Al</b> | <b>Ti</b> | <b>Fe</b> | <b>Ni</b> | <b>Cu</b> | <b>Zn</b> | <b>Ba</b> | <b>Pb</b> |
|-----------------------------------------------------------------------------------------------------------|-----------|-----------|-----------|-----------|-----------|-----------|-----------|-----------|-----------|
| Average mass fraction in tyre ( $\mu\text{g g}^{-1}$ ) -<br><b>A</b>                                      | 55        | 695       | 47        | 102       | 3         | 3         | 9028      | 3         | 21        |
| PM10 tyre wear emission rate<br>(passenger cars) ( $\text{mg km}^{-1}$ ) [USEPA<br>MOVES tool] - <b>B</b> |           |           |           |           | 5         |           |           |           |           |
| Metals in PM10 tyre wear emission<br>rate (passenger cars) ( $\text{ng km}^{-1}$ ) - <b>C</b>             | 273       | 3477      | 236       | 511       | 13        | 14        | 45141     | 14        | 106       |
| Distance driven by cars & taxis in<br>Great Britain in 2020 (km) - <b>D</b>                               |           |           |           |           | 3.18E+11  |           |           |           |           |
| Metals in PM10 tyre wear emissions<br>from cars and taxis in Great Britain in<br>2020 - <b>E</b>          | 87        | 1104      | 75        | 162       | 4         | 4         | 14337     | 4         | 34        |
| PM10 emitted from tyre wear<br>(passenger cars) in 2020 (kt)<br>[UKNAEI] - <b>F</b>                       |           |           |           |           | 2.718     |           |           |           |           |
| Metals in PM10 in 2020 (kg) - <b>G</b>                                                                    | 148       | 1890      | 128       | 278       | 7         | 8         | 24540     | 7         | 58        |

10

11  $A \times B = c$

12  $C \times (D \times 10^{-12}) = E$

13  $A \times F = G$

14
