# Supplementary figures and images for: Traceable determination of metal composition of tyres using tandem ICP-MS and benchmarking of emissions inventories
Source: Royal Society of Chemistry journal article supplement (doi:10.1039/d3em00344b), 2024-01-01

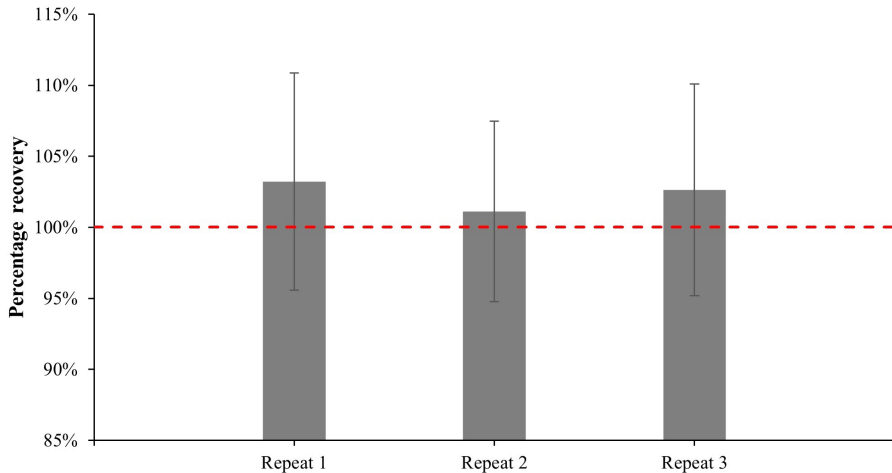

Supplement: d3em00344b1.pdf [file d3em00344b1.pdf]
